# Supplementary material for: Rational Food Design Targeting Micronutrient Deficiencies in Adolescents: Nutritional, Acoustic-Mechanical and Sensory Properties of Chickpea-Rice Biscuits
Source: Preprints.org preprint supplement (doi:10.20944/preprints202301.0512.v1), 2023-01-28
Supplement: Supplementary file 1 [file supplementary]

For a correct performance of the test, please read carefully the instructions that will appear throughout the session. If in doubt, consult the staff in the room.

1. **Enter your email address.**

**THE PRODUCT:**

In today's tasting we are going to try a type of plain biscuit.

**SENSORY EVALUATION OF THE PRODUCT:**

1. **Please taste the** **sample and indicate how much the** **following characteristics of the product were liked with the help of the scale:**

*The consumers were asked to record their liking intensity scores for appearance, colour, aroma, flavour and texture. A 9-point hedonic scale was used (9 = like extremely and 1 = dislike extremely).

A print-screen of the questionnaire is shown in Spanish.

1. **In your opinion, the option that best describes the overall quality of this snack** **is:**

1. **Are you able to identify a particular flavour?**  **Please specify**

**CONSUMPTION HABITS:**

1. **Do you consume biscuits?**

a) Yes (next question)

b) No (skip next question)

1. **How often do you eat biscuits?**
2. twice a week or more often
3. once a week
4. twice a month
5. once a month
6. once every 2–3 months
7. less frequently

**SOCIODEMOGRAPHIC DATA:**

The data that you are going to fill in below will be used only for the preparation of this work and will be treated confidentially.

1. **Year of birth:**
2. **Gender:**
3. Female
4. Male
5. Non-binary

**END OF SENSORY EVALUATION SESSION:**

You have reached the end of this session.

Thank you very much and see you soon.

Social and Consumer Science Laboratory Team
